# Supplementary material for: Selective Interactions of Mouse Melanocortin Receptor Accessory Proteins with Somatostatin Receptors
Source: Cells. 2022 Jan 13;11(2):267. doi: 10.3390/cells11020267 (PMC8773839; doi:10.3390/cells11020267)
Supplement: Supplementary file 1 [file cells-11-00267-s001.zip › Table S1.xlsx]

## Sheet: Fig.3A protein
Accession	Description	Coverage [%]	Peptides	PSMs	Unique Peptides	AAs	MW [kDa]	calc. pI	Score Sequest HT: Sequest HT	Peptides (by Search Engine): Sequest HT
NP_033244.2	somatostatin receptor type 3 [Mus musculus]	8	2	2	2	428	47.2	8.59	5.17	2
NP_001036071.1	somatostatin receptor type 2 isoform A [Mus musculus]	2	1	1	1	369	41.2	8.97	1.92	1

## Sheet: Fig.3A peptide
Annotated Sequence	Modifications	Protein Groups	Proteins	PSMs	Master Protein Accessions	Positions in Master Proteins	Missed Cleavages	Theo. MH+ [Da]	XCorr (by Search Engine): Sequest HT
[K].EQQLLPQEATAGDK.[A]		1	1	1	NP_033244.2	NP_033244.2 [408-421]	0	1527.76	2.13
[R].LSQIAQAGTSGQQPRPCTGTAK.[E]	1xCarbamidomethyl [C17]	1	1	1	NP_033244.2	NP_033244.2 [386-407]	0	2257.14	3.04
[K].VSGTEDGER.[S]		1	1	1	NP_001036071.1	NP_001036071.1 [332-340]	0	949.422	1.92

## Sheet: Fig.3B protein
Accession	Description	Coverage [%]	Peptides	PSMs	Unique Peptides	AAs	MW [kDa]	calc. pI	Score Sequest HT: Sequest HT	Peptides (by Search Engine): Sequest HT	Found in Sample: [S2] F2: Sample
NP_035555.1	somatostatin receptor type 5 [Mus musculus]	20	11	22	11	362	40	9.41	9.72	11	High
NP_001036071.1	somatostatin receptor type 2 isoform A [Mus musculus]	23	9	11	9	369	41.2	8.97	0	9	Low

## Sheet: Fig.3B peptide
High	[R].GYGVEDADAIEPRPDK.[S]		1	1	1	NP_035555.1	NP_035555.1 [323-338]	0	1731.82	High	High	3.46
High	[K].SGRPQTTLPTR.[S]		1	1	2	NP_035555.1	NP_035555.1 [339-349]	0	1213.66	High	High	2.43
Medium	[R].YLAVVHPLR.[S]		1	1	2	NP_035555.1	NP_035555.1 [135-143]	0	1067.64	Medium	Medium	2.12
Low	[R].LNETTETQR.[T]		1	1	2	NP_001036071.1	NP_001036071.1 [350-358]	0	1091.53	Low	Low	0.46
Low	[K].VKAAGMR.[V]	1xOxidation [M6]	1	1	2	NP_035555.1	NP_035555.1 [226-232]	1	748.413	Low	Low	0.4
Low	[R].KALCLR.[R]	1xCarbamidomethyl [C4]	1	1	3	NP_035555.1	NP_035555.1 [316-321]	1	760.45	Low	Low	0.39
Low	[K].VKAAGMRVGSSR.[R]	1xOxidation [M6]	1	1	2	NP_035555.1	NP_035555.1 [226-237]	2	1234.67	Low	Low	0.29
Low	[K].ALCLRR.[G]	1xCarbamidomethyl [C3]	1	1	3	NP_035555.1	NP_035555.1 [317-322]	1	788.456	Low	Low	0.24
Low	[K].AAGMRVGSSR.[R]		1	1	1	NP_035555.1	NP_035555.1 [228-237]	1	991.51	Low	Low	0.24
Low	[R].YLAVVHPIKSAK.[W]		1	1	1	NP_001036071.1	NP_001036071.1 [141-152]	1	1325.79	Low	Low	0.22
Low	[R].YLAVVHPLRSARWR.[R]		1	1	1	NP_035555.1	NP_035555.1 [135-148]	2	1723.99	Low	Low	0.22
Low	[K].AAGMRVGSSRR.[R]	1xOxidation [M4]	1	1	1	NP_035555.1	NP_035555.1 [228-238]	2	1163.61	Low	Low	0.21
Low	[K].SEKKVTR.[M]		1	1	1	NP_001036071.1	NP_001036071.1 [250-256]	2	847.5	Low	Low	0.19
Low	[K].SFQNVLCLVK.[V]	1xCarbamidomethyl [C7]	1	1	1	NP_001036071.1	NP_001036071.1 [322-331]	0	1207.65	Low	Low	0.19
Low	[R].VVMTVDGINQFTSIFCLTVMSIDR.[Y]	1xCarbamidomethyl [C16]	1	1	1	NP_001036071.1	NP_001036071.1 [117-140]	0	2746.36	Low	Low	0.16
Low	[K].AAGMRVGSSRR.[R]		1	1	1	NP_035555.1	NP_035555.1 [228-238]	2	1147.61	Low	Low	0.16
Low	[R].EEEERRMQR.[G]	1xOxidation [M7]	1	1	1	NP_033244.2	NP_033244.2 [370-378]	2	1278.59	Low	Low	0.15
Low	[K].VKAAGMR.[V]		1	1	2	NP_035555.1	NP_035555.1 [226-232]	1	732.418	Low	Low	0.12
Low	[K].SSGIRVGSSK.[R]		1	1	1	NP_001036071.1	NP_001036071.1 [237-246]	1	977.537	Low	Low	0.11
Low	[K].SSGIRVGSSKR.[K]		1	1	2	NP_001036071.1	NP_001036071.1 [237-247]	2	1133.64	Low	Low	0.09
Low	[R].RMQRGQEMNGR.[L]		1	1	1	NP_033244.2	NP_033244.2 [375-385]	2	1362.65	Low	Low	0.08
Low	[R].TLLNGDLQTSI.[-]		1	1	1	NP_001036071.1	NP_001036071.1 [359-369]	0	1174.63	Low	Low	0.08
Low	[R].EEEERRMQR.[G]		1	1	1	NP_033244.2	NP_033244.2 [370-378]	2	1262.59	Low	Low	0.08
Low	[R].FKQGFRR.[I]		1	1	1	NP_033244.2	NP_033244.2 [329-335]	2	938.532	Low	Low	0.05
Low	[ER].EEEERR.[EM]		1	1	1	NP_033244.2	NP_033244.2 [364-369]; [370-375]	1	847.39	Low	Low	0.04
Low	[R].REEEER.[R]		1	1	1	NP_033244.2	NP_033244.2 [369-374]	1	847.39	Low	Low	0.04
Low	[K].SGRPQTTLPTRSCEANGLMQTSRL.[-]	1xCarbamidomethyl [C13]	1	1	1	NP_035555.1	NP_035555.1 [339-362]	2	2661.32	Low	Low	0.03
Low	[R].LNETTETQRTLLNGDLQTSI.[-]		1	1	1	NP_001036071.1	NP_001036071.1 [350-369]	1	2247.15	Low	Low	0.02
